# Supplementary material for: Large ferroelectric-polarization-modulated photovoltaic effects in bismuth layered multiferroic/semiconductor heterostructure devices
Source: Royal Society of Chemistry journal article supplement (doi:10.1039/d0tc05638c), 2021-01-01
Supplement: d0tc05638c1.pdf [file d0tc05638c1.pdf]

## Supplementary Information

### Large Ferroelectric-Polarization-Modulated Photovoltaic Effect in Bismuth Layered Multiferroics/Semiconductor Heterostructure Devices

Jian-Min Yan,<sup>a, c</sup> Ke Wang,<sup>b</sup> Zhi-Xue Xu,<sup>c</sup> Jing-Shi Ying,<sup>d</sup> Ting-Wei Chen,<sup>d</sup> Guo-Liang Yuan,<sup>e</sup>  
Tao Zhang,<sup>f</sup> Hai-Wu Zheng,<sup>\*, b</sup> Yang Chai,<sup>a</sup> and Ren-Kui Zheng<sup>\*, d, c</sup>

<sup>a</sup> Department of Applied Physics, The Hong Kong Polytechnic University, Kowloon, Hong Kong, China

<sup>b</sup> International Joint Research Laboratory of New Energy Materials and Devices of Henan Province, Henan University, Kaifeng 475004, China

<sup>c</sup> State Key Laboratory of High Performance Ceramics and Superfine Microstructure, Shanghai Institute of Ceramics, Chinese Academy of Sciences, Shanghai 200050, China

<sup>d</sup> School of Materials Science and Engineering and Jiangxi Engineering Laboratory for Advanced Functional Thin Films, Nanchang University, Nanchang 330031, China

<sup>e</sup> School of Materials Science and Engineering, Nanjing University of Science and Technology, Nanjing 210094, China

<sup>f</sup> School of Physics and Materials Science, Guangzhou University, Guangzhou 510006, China

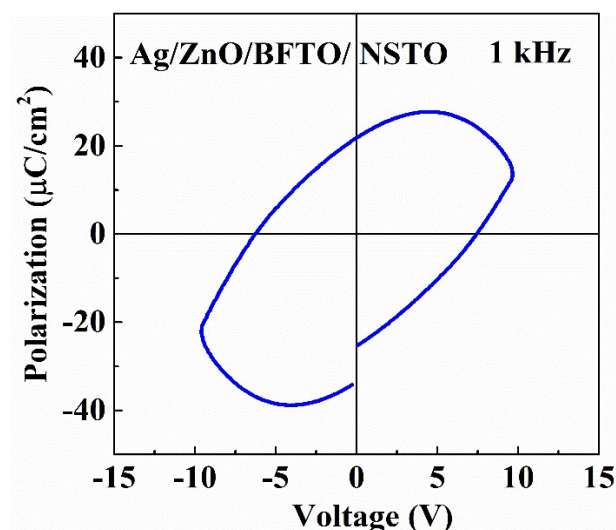

**Fig. S1** Room temperature ferroelectric hysteresis loop for the Ag/ZnO/BFTO/NSTO structure, as measured at 1 kHz.

\* Corresponding authors. E-mail: [zhenghaiw@ustc.edu](mailto:zhenghaiw@ustc.edu) (H.W. Zheng); [zrk@ustc.edu](mailto:zrk@ustc.edu) (R.K. Zheng)

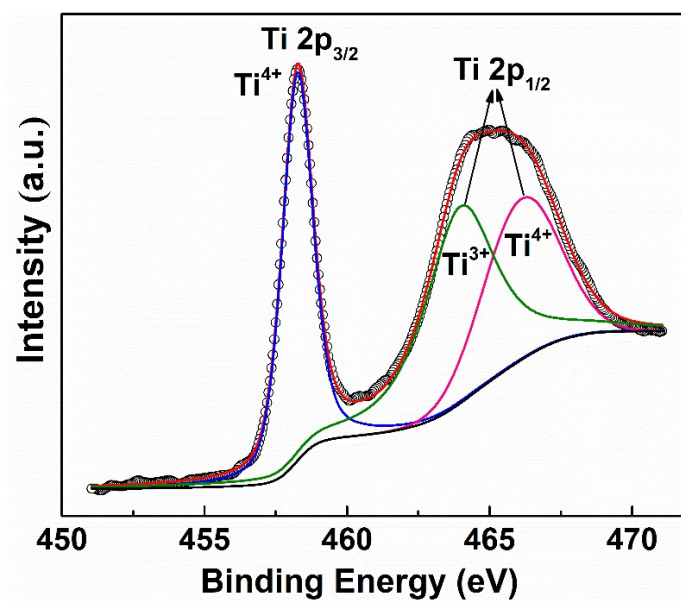

Fig. S2 XPS spectra for Ti-2p of a BFTO film.
